# Supplementary material
Source: MDPI journal article supplement (https://www.mdpi.com/2073-4395/13/2/309)
Supplement: s1 [file s1]

**Table S1.** Compost characteristics.

| Compost                        |                     | 1st year | 2nd year |
|--------------------------------|---------------------|----------|----------|
| pH <sub>(H2O)</sub>            |                     | 8.1      | 7.9      |
| pH <sub>(KCl)</sub>            |                     | 7.4      | 7        |
| Organic C                      | g kg <sup>-1</sup>  | 349      | 339      |
| Organic matter                 | %                   | 69.7     | 67.7     |
| Total N                        | g kg <sup>-1</sup>  | 25.2     | 27.2     |
| C/N                            |                     | 13.8     | 12.5     |
| Assimilable K                  | mg kg <sup>-1</sup> | 327      | 207      |
| Assimilable P                  |                     | 464      | 444      |
| Exchange complex               | K <sup>+</sup>      | 96.4     | 51.8     |
|                                | Ca <sup>2+</sup>    | 20.5     | 42.1     |
|                                | Mg <sup>2+</sup>    | 10.7     | 24.2     |
|                                | Al <sup>3+</sup>    | 0.1      | 0.1      |
|                                | Na <sup>+</sup>     | 0.53     | 0.71     |
|                                | CECe                | 113.7    | 118.9    |
| Ratio between exchange cations | Ca/Mg               | 2        | 2        |
|                                | K/Mg                | 9        | 2.1      |

**Table S2.** Treatments with phytosanitary products, fertilizers and enrichers carried out in all the study plots each year.

| Date of application                                                   | Products                              | Treatment for                                                   | Active ingredients                                                                                                                                                                                                                                                                                                    | Dosage/100 L              |
|-----------------------------------------------------------------------|---------------------------------------|-----------------------------------------------------------------|-----------------------------------------------------------------------------------------------------------------------------------------------------------------------------------------------------------------------------------------------------------------------------------------------------------------------|---------------------------|
| 3 <sup>rd</sup> week April                                            | Xilug<br>Luqsazufre<br>Goemar         | Downy mildew, powdery mildew, eriophids and red spider mite.    | <ul style="list-style-type: none"> <li>• Metalaxil 8%, Mancozeb 60%</li> <li>• Luqsazufre 80</li> <li>• Seaweed cream: 25% of <i>Ascophyllum nodosum</i> extracts: 12.5 % of organic matter, 4% K<sub>2</sub>O, 4% alginic acid, 0.5% mannitol. Contains plant hormones (cytokinin, auxins, gibberellins).</li> </ul> | 250 g<br>400 g<br>300 mL  |
| 4 <sup>th</sup> week April                                            | Pearze triple<br>Luqsazufre           | Downy mildew and alternaria                                     | <ul style="list-style-type: none"> <li>• Fosetil 50% • Cimox 4%, • Folpet 25%</li> <li>• Sulfur 80%</li> </ul>                                                                                                                                                                                                        | 250 g<br>400 g            |
| 2 <sup>nd</sup> week May                                              | Acrobat Cu<br>Luqsazufre              |                                                                 | <ul style="list-style-type: none"> <li>• Dimetomorf 6% • Copper 40%</li> <li>• Sulfur 60%</li> </ul>                                                                                                                                                                                                                  | 300 g<br>400 g            |
| 3 <sup>rd</sup> week May                                              | Barolom Combi<br>Luqsazufre<br>Goemar | Downy mildew                                                    | <ul style="list-style-type: none"> <li>• Metalaxil 4.8% • Folpet 40%</li> <li>• Sulfur 80%</li> <li>• Seaweed cream</li> </ul>                                                                                                                                                                                        | 200 g<br>400 g<br>300 mL  |
| 4 <sup>th</sup> week May                                              | Helice<br>Shavit<br>Bulldock          |                                                                 | <ul style="list-style-type: none"> <li>• Cimox 4% • Folpet 205 • Copper 15%</li> <li>• Triadimenol 25%</li> <li>• Betaciflutrin 2.5%</li> </ul>                                                                                                                                                                       | 300 g<br>500 mL<br>80 mL  |
| 2 <sup>nd</sup> week June                                             | Xilug<br>Kohinor<br>Dorado            | Downy mildew, powdery mildew, eriophids and red spider mite.    | <ul style="list-style-type: none"> <li>• Metalaxil 8% • Mancozeb 60%</li> <li>• Midacloprid 20%</li> <li>• Penconazol 10%</li> </ul>                                                                                                                                                                                  | 300 g<br>500 mL<br>400 mL |
| 3 <sup>rd</sup> week June                                             | Milzan<br>Shavit                      | Downy mildew                                                    | <ul style="list-style-type: none"> <li>• Cimoxanilo 4% • Mancozeb 40%</li> <li>• Triadimenol 25%</li> </ul>                                                                                                                                                                                                           | 400 g<br>50 mL            |
| 4 <sup>th</sup> week June                                             | Helice<br>Luqsazufre<br>M-10          | Downy mildew, powdery mildew, eriophids and red spider mite.    | <ul style="list-style-type: none"> <li>• Cimox 4%, • Folpet 20%, • Copper 15%</li> <li>• Sulfur 80%</li> <li>• Fertilizer CEE (21% P, 28% K, 0.14% B, 0.14% Mn y 0.014% Mo (p/V))</li> </ul>                                                                                                                          | 300 g<br>400 mL<br>400 g  |
| 2 <sup>nd</sup> week July                                             | Conkora                               |                                                                 | <ul style="list-style-type: none"> <li>• Cimox 5% • Copper 22.5%</li> </ul>                                                                                                                                                                                                                                           | 400 g                     |
| 3 <sup>rd</sup> week July                                             | Luqsazufre                            |                                                                 | <ul style="list-style-type: none"> <li>• Sulfur 80%</li> </ul>                                                                                                                                                                                                                                                        | 400 g                     |
| 1 <sup>st</sup> week August                                           | Trimilzan<br>Shavit<br>Kohinor        | Downy mildew                                                    | <ul style="list-style-type: none"> <li>• Cimoxanilo 3% • Copper 28%</li> <li>• Triadimenol 25 %</li> <li>• Imida cloprid 25%</li> </ul>                                                                                                                                                                               | 400 g<br>45 mL<br>50 mL   |
| 2 <sup>nd</sup> week August                                           | Trimilzán<br>Luqsazufre<br>M-10       | Powdery mildew, eriophids and red spider mite.                  | <ul style="list-style-type: none"> <li>• Cimoxanilo 3% • Copper 28%</li> <li>• Sulfur 80%</li> <li>• Fertilizer CEE</li> </ul>                                                                                                                                                                                        | 400 g<br>400 mL<br>400 g  |
| 4 <sup>th</sup> week August                                           | Timilzan<br>Astound<br>Bulldock       | Downy mildew                                                    | <ul style="list-style-type: none"> <li>• Cimoxanilo 3% • Copper 28%</li> <li>• Ciprodinil 37.5% • Fludioxonil 25%</li> <li>• Betaciflutrin 2.5%</li> </ul>                                                                                                                                                            | 400 g<br>400 g<br>500 mL  |
| Between April and July (bimonthly application)                        | Zineb                                 | Downy mildew. It also acts against. Peronospora and anthracnose | <ul style="list-style-type: none"> <li>• Etilen-bisditiocarbamate of Zn</li> </ul>                                                                                                                                                                                                                                    | 300 g                     |
| 3 <sup>rd</sup> week April (2 <sup>nd</sup> and 3 <sup>er</sup> year) | Magnesian limestone                   | Correction of acidity and cation imbalances.                    | <ul style="list-style-type: none"> <li>• 60% CaCO<sub>3</sub> + 20% MgO (amendment, fast acting. Contains small amounts of microelements: B, Mn and Zn).</li> </ul>                                                                                                                                                   | 1500 kg/ha                |

**Table S3.** Physical soil characteristics.

| Soil | Bulk density (g cm <sup>-3</sup> ) | Stoniness (%) | Sand (%) | Silt (%) | Clay (%) | Texture    |
|------|------------------------------------|---------------|----------|----------|----------|------------|
| A1   | 1.29a                              | 60.5a         | 78.7a    | 16.1a    | 5.2c     | Sandy-loam |
| A2   | 1.34a                              | 54.1b         | 78.7a    | 16.1a    | 5.2c     | Sandy-loam |
| A3   | 1.35a                              | 61.5a         | 78.7a    | 16.1a    | 5.2c     | Sandy-loam |
| A4   | 0.98c                              | 56.4b         | 79.9a    | 16.7a    | 3.4d     | Sandy-loam |
| A5   | 0.98c                              | 60.7a         | 79.9a    | 16.7a    | 3.4d     | Sandy-loam |
| A6   | 0.96c                              | 52.0b         | 79.9a    | 16.7a    | 3.4d     | Sandy-loam |
| B1   | 0.99c                              | 39.4cd        | 75.9a    | 17.9a    | 6.2b     | Sandy-loam |
| B2   | 0.99c                              | 40.3c         | 75.9a    | 17.9a    | 6.2b     | Sandy-loam |
| B3   | 0.99c                              | 41.6c         | 75.9a    | 17.9a    | 6.2b     | Sandy-loam |
| B4   | 1.10b                              | 14.5f         | 76.1a    | 17.6a    | 6.3b     | Sandy-loam |
| B5   | 1.12b                              | 24.4e         | 76.1a    | 17.6a    | 6.3b     | Sandy-loam |
| B6   | 1.14b                              | 63.9a         | 76.1a    | 17.6a    | 6.3b     | Sandy-loam |
| B7   | 0.98c                              | 44.7c         | 75.5a    | 18.1a    | 6.4b     | Sandy-loam |
| B8   | 0.98c                              | 37.9d         | 75.5a    | 18.1a    | 6.4b     | Sandy-loam |
| CA   | 0.35d                              | 44.6c         | 71.8b    | 19.6a    | 8.6a     | Loamy-sand |
| CB   | 0.44d                              | 10.2f         | 75.5a    | 15.8b    | 8.7a     | Loamy-sand |

In each column, values with different letters differ significantly ( $p < 0.05$ ).

**Table S4.** Chemical soil characteristics (First year of sampling).

| Soil                   | pH<br>(H <sub>2</sub> O) | pH<br>(KCl) | Org C              | OM    | N                  | K                   | P                        | C/N    | K <sup>+</sup> | Ca <sup>2+</sup> | Mg <sup>2+</sup> | Al <sup>3+</sup> | Na <sup>+</sup> | eCEC   | Ca/Mg | K/Mg |
|------------------------|--------------------------|-------------|--------------------|-------|--------------------|---------------------|--------------------------|--------|----------------|------------------|------------------|------------------|-----------------|--------|-------|------|
|                        |                          |             | g kg <sup>-1</sup> | %     | g kg <sup>-1</sup> | mg kg <sup>-1</sup> | cmol(+) kg <sup>-1</sup> |        |                |                  |                  |                  |                 |        |       |      |
| 1st sampling – October |                          |             |                    |       |                    |                     |                          |        |                |                  |                  |                  |                 |        |       |      |
| A1                     | 5.9c                     | 5.3c        | 8.6f               | 1.5f  | 0.6f               | 259d                | 86b                      | 14.3h  | 0.7c           | 12.2d            | 2.5f             | 0.1d             | 0.1c            | 15.5d  | 5.0f  | 0.3e |
| A2                     | 6.1c                     | 5.0c        | 9.4f               | 1.6f  | 0.7f               | 263d                | 89b                      | 13.4h  | 0.7c           | 7.2e             | 2.6f             | 0.1d             | 0.1c            | 10.6ef | 2.8g  | 0.3e |
| A3                     | 6.8b                     | 5.6b        | 7.8f               | 1.4f  | 0.7f               | 248d                | 91b                      | 11.1h  | 0.6c           | 8.7e             | 2.9e             | 0.1d             | 0.1c            | 12.5e  | 3.0g  | 0.2e |
| A4                     | 5.7c                     | 4.7c        | 17.5e              | 3.0e  | 0.7f               | 280d                | 71c                      | 25.0f  | 0.7c           | 4.4f             | 2.0f             | 0.1d             | 0.1c            | 7.4g   | 2.2g  | 0.4e |
| A5                     | 5.6c                     | 5.7b        | 18.0e              | 3.1e  | 0.8f               | 284d                | 76c                      | 22.5f  | 0.7c           | 9.7e             | 2.5f             | 0.1d             | 0.2c            | 13.2e  | 3.9f  | 0.3e |
| A6                     | 5.7c                     | 5.8b        | 17.0e              | 2.9e  | 0.6f               | 286d                | 67c                      | 28.3f  | 0.7c           | 7.4e             | 2.3f             | 0.1d             | 0.1c            | 10.7ef | 3.2g  | 0.3e |
| B1                     | 6.3b                     | 5.6b        | 16.0e              | 2.8e  | 0.2f               | 261d                | 86b                      | 80.0b  | 0.7c           | 2.6f             | 1.4g             | 0.4c             | 0.1c            | 5.2g   | 1.9g  | 0.5d |
| B2                     | 6.1c                     | 5.8b        | 15.0e              | 2.6e  | 0.3f               | 255d                | 89b                      | 50.0d  | 0.7c           | 11.8d            | 1.4g             | 0.1d             | 0.2c            | 14.1d  | 8.7e  | 0.5d |
| B3                     | 5.4d                     | 5.7b        | 15.5e              | 2.7e  | 0.4f               | 264d                | 91b                      | 38.8e  | 0.7c           | 2.8f             | 1.9f             | 0.1d             | 0.1c            | 5.6e   | 1.5g  | 0.4e |
| B4                     | 6.5b                     | 6.1b        | 20.0d              | 4.0d  | 0.2f               | 390c                | 86b                      | 100.0a | 1.0b           | 5.7e             | 2.0f             | 0.1d             | 0.1c            | 8.9f   | 2.8g  | 0.5d |
| B4                     | 6.6b                     | 5.4c        | 21.0d              | 4.2d  | 0.3f               | 382c                | 89b                      | 70.0c  | 1.0b           | 3.1f             | 2.1f             | 0.3c             | 0.2c            | 6.7g   | 1.5g  | 0.5d |
| B6                     | 6.5b                     | 5.1c        | 21.5d              | 4.3d  | 0.2f               | 396c                | 91b                      | 107.5a | 1.0b           | 2.5f             | 2.0f             | 0.6c             | 0.1c            | 6.2g   | 1.3g  | 0.5d |
| B7                     | 5.9c                     | 5.6b        | 19.0d              | 3.3d  | 0.3f               | 333d                | 67c                      | 63.3c  | 0.9b           | 3.7f             | 0.6h             | 0.1d             | 0.1c            | 5.4g   | 6.3e  | 1.4b |
| B8                     | 6.0c                     | 5.0c        | 17.0d              | 2.9d  | 0.4f               | 314d                | 54c                      | 42.5de | 0.8c           | 2.8f             | 0.6h             | 0.4c             | 0.1c            | 4.8g   | 4.4f  | 1.3b |
| CA                     | 4.9d                     | 4.3d        | 56.0a              | 11.2a | 11.3a              | 158e                | 2e                       | 5.4i   | 0.3d           | 0.2g             | 0.2h             | 1.6b             | 0.2c            | 2.5h   | 1.1h  | 1.6b |
| CB                     | 4.9d                     | 3.9d        | 44.0b              | 8.8b  | 3.9c               | 162e                | 2e                       | 12.7h  | 0.3d           | 1.9f             | 0.7h             | 2.7a             | 0.2c            | 5.8g   | 2.7g  | 0.5d |
| 2nd sampling – March   |                          |             |                    |       |                    |                     |                          |        |                |                  |                  |                  |                 |        |       |      |
| A1                     | 6.9b                     | 6.2b        | 36.5b              | 7.3b  | 2.7d               | 386c                | 73c                      | 13.4h  | 1.0b           | 19.5c            | 3.2e             | 0.1d             | 0.2c            | 23.9c  | 6.1f  | 0.3e |
| A2                     | 6.7b                     | 5.9b        | 33.0c              | 6.6c  | 3.3d               | 560a                | 45d                      | 10.0hi | 1.4b           | 16.0c            | 2.7e             | 0.1d             | 0.2c            | 20.3c  | 6.0f  | 0.5d |
| A3                     | 7.0b                     | 6.4a        | 33.5c              | 6.7c  | 4.2c               | 404c                | 103b                     | 8.0i   | 1.0b           | 20.3c            | 1.5f             | 0.1d             | 0.1c            | 23.0c  | 13.9c | 0.7d |
| A4                     | 6.3b                     | 5.5b        | 32.0c              | 6.4c  | 3.6d               | 294d                | 67c                      | 8.8i   | 0.7c           | 13.3d            | 2.3f             | 0.1d             | 0.1c            | 16.6d  | 5.8f  | 0.3e |
| A5                     | 7.1a                     | 6.4a        | 30.0c              | 6.0c  | 2.5d               | 236d                | 68c                      | 12.2h  | 0.6c           | 24.6b            | 1.2f             | 0.1d             | 0.1c            | 26.6b  | 20.5b | 0.5d |
| A6                     | 7.2a                     | 6.4a        | 23.5d              | 4.7d  | 2.0d               | 202e                | 52d                      | 11.6h  | 0.5c           | 20.0c            | 0.7g             | 0.1d             | 0.1c            | 21.5c  | 27.0a | 0.7d |
| B1                     | 7.2a                     | 6.2b        | 29.5c              | 5.9c  | 2.6d               | 360c                | 108a                     | 11.4h  | 0.9c           | 20.1c            | 4.9d             | 0.1d             | 0.1c            | 26.1c  | 4.1f  | 0.2e |
| B2                     | 7.1a                     | 6.3a        | 21.0d              | 4.2d  | 1.9d               | 238d                | 106a                     | 11.1h  | 0.6c           | 15.4d            | 3.9e             | 0.1d             | 0.1c            | 20.1c  | 3.9f  | 0.2e |
| B3                     | 7.2a                     | 6.1b        | 28.0c              | 5.6c  | 2.5d               | 278d                | 107a                     | 11.1h  | 0.7c           | 13.6d            | 6.3c             | 0.1d             | 0.1c            | 20.8c  | 2.2g  | 0.1e |
| B4                     | 7.5a                     | 6.8a        | 45.0b              | 9.0b  | 4.1c               | 214e                | 111a                     | 10.9h  | 0.5c           | 38.8a            | 4.6d             | 0.1d             | 0.1c            | 44.2a  | 8.4e  | 0.1e |
| B4                     | 6.9b                     | 6.2b        | 31.5c              | 6.3c  | 2.9d               | 274d                | 131a                     | 11.0h  | 0.7c           | 19.3c            | 4.5d             | 0.1d             | 0.1c            | 24.7c  | 4.3f  | 0.2e |
| B6                     | 6.7b                     | 6.0b        | 45.5b              | 9.1b  | 3.9d               | 362c                | 79c                      | 11.8h  | 0.9c           | 20.4c            | 4.7d             | 0.1d             | 0.2c            | 26.3b  | 4.3f  | 0.2e |
| B7                     | 7.2a                     | 6.5a        | 48.5b              | 9.7b  | 4.3c               | 474b                | 86b                      | 11.4h  | 1.2b           | 20.2c            | 10.6a            | 0.1d             | 0.2c            | 32.2b  | 1.9g  | 0.1e |
| B8                     | 6.6b                     | 5.8b        | 39.5b              | 7.9b  | 3.4c               | 374c                | 76c                      | 11.5h  | 0.9c           | 16.5c            | 4.2d             | 0.1d             | 0.1c            | 21.8c  | 4.0f  | 0.2e |
| CA                     | 5.0d                     | 4.2d        | 61.0a              | 12.0a | 11.4a              | 112d                | 3e                       | 5.4i   | 0.4d           | 0.2g             | 0.2h             | 1.6b             | 0.2c            | 2.6h   | 1.0h  | 2.0a |
| CB                     | 4.9d                     | 3.9d        | 48.0b              | 9.6b  | 3.8c               | 138d                | 7e                       | 12.6h  | 0.3d           | 2.0f             | 0.7h             | 2.8a             | 0.1c            | 5.9g   | 2.9g  | 0.4e |
| 3rd sampling – July    |                          |             |                    |       |                    |                     |                          |        |                |                  |                  |                  |                 |        |       |      |
| A1                     | 6.9b                     | 6.2b        | 26.0c              | 5.2c  | 1.8d               | 278d                | 51d                      | 14.6h  | 0.7c           | 10.9d            | 1.9f             | 0.1d             | 0.1c            | 13.8e  | 5.7f  | 0.4e |
| A2                     | 6.5b                     | 5.9b        | 29.5c              | 5.9c  | 2.7d               | 672a                | 54c                      | 11.1h  | 1.7b           | 11.0d            | 1.8f             | 0.1d             | 0.2c            | 14.8e  | 6.1f  | 0.9c |
| A3                     | 7.0b                     | 6.4a        | 26.0c              | 5.2c  | 2.4d               | 284d                | 40d                      | 10.9h  | 0.7c           | 16.9c            | 1.2g             | 0.1d             | 0.1c            | 19.1d  | 13.7c | 0.6d |
| A4                     | 6.5b                     | 5.9b        | 31.0c              | 6.2c  | 2.5d               | 364c                | 60c                      | 12.6h  | 0.9c           | 15.2d            | 2.6f             | 0.1d             | 0.2c            | 19.0d  | 5.9f  | 0.4e |
| A5                     | 7.3a                     | 6.7a        | 28.0c              | 5.6c  | 2.4d               | 362c                | 57c                      | 11.5h  | 0.9c           | 24.0b            | 1.9f             | 0.1d             | 0.2c            | 27.1b  | 12.8c | 0.5d |
| A6                     | 6.9b                     | 6.4a        | 21.5d              | 4.3d  | 1.9d               | 210e                | 51d                      | 11.6h  | 0.5c           | 16.2c            | 1.3g             | 0.1d             | 0.2c            | 18.2d  | 13.0c | 0.4e |
| B1                     | 7.1a                     | 6.5a        | 23.0d              | 4.6d  | 1.8d               | 480b                | 60c                      | 12.6h  | 1.2b           | 15.3e            | 3.5e             | 0.1d             | 0.2c            | 20.3c  | 4.4f  | 0.3e |
| B2                     | 7.1a                     | 6.6a        | 13.5e              | 2.7e  | 1.0d               | 344c                | 67c                      | 13.0h  | 0.9c           | 11.0e            | 2.3f             | 0.1d             | 0.1c            | 14.4e  | 4.7f  | 0.4e |
| B3                     | 7.6a                     | 7.1a        | 24.5d              | 4.9d  | 1.8d               | 304d                | 96b                      | 13.7h  | 0.8c           | 21.7b            | 5.4c             | 0.1d             | 0.1c            | 28.1b  | 4.0f  | 0.1e |
| B4                     | 7.2a                     | 6.6a        | 29.0c              | 5.8c  | 1.8d               | 352c                | 79c                      | 16.4h  | 0.9c           | 15.8c            | 4.0d             | 0.1d             | 0.2c            | 21.0c  | 4.0f  | 0.2e |
| B4                     | 7.5a                     | 6.9a        | 36.0c              | 7.2c  | 2.6d               | 348c                | 99b                      | 13.8h  | 0.9c           | 23.5b            | 5.8c             | 0.1d             | 0.2c            | 30.5b  | 4.0f  | 0.2e |
| B6                     | 7.2a                     | 6.5a        | 49.5b              | 9.9b  | 3.0d               | 442c                | 67c                      | 16.8h  | 1.1b           | 16.9c            | 7.6b             | 0.1d             | 0.2c            | 25.9c  | 2.2g  | 0.2e |
| B7                     | 7.2a                     | 6.5a        | 53.5a              | 10.7a | 3.2c               | 462b                | 80b                      | 16.7h  | 1.2b           | 17.1c            | 8.4ab            | 0.1d             | 0.2c            | 27.0b  | 2.0g  | 0.1e |
| B8                     | 7.0b                     | 6.3a        | 48.5b              | 9.7b  | 3.1c               | 382c                | 83b                      | 15.7h  | 1.0b           | 14.0d            | 7.2b             | 0.1d             | 0.2c            | 22.4c  | 2.0g  | 0.1e |
| CA                     | 4.9d                     | 4.2d        | 61.5a              | 12.3a | 11.5a              | 113d                | 3e                       | 5.3i   | 0.3d           | 0.2g             | 0.2h             | 1.5b             | 0.2c            | 2.4h   | 1.0h  | 1.5b |
| CB                     | 4.8d                     | 3.9d        | 47.5b              | 9.5b  | 3.8c               | 138d                | 8e                       | 12.5h  | 0.3d           | 1.8f             | 0.8h             | 2.8a             | 0.2c            | 5.9g   | 2.3g  | 0.4e |

Org C: Organic carbon content; OM: Organic matter; eCEC: effective cation exchange capacity. In each column, values with different letters differ significantly ( $p < 0.05$ ).

**Table S5.** Chemical soil characteristics (Second year of sampling).

| Soil                               | pH<br>(H <sub>2</sub> O) | pH<br>(KCl) | Org C              | OM    | N                  | K                   | P                        | C/N    | K <sup>+</sup> | Ca <sup>2+</sup> | Mg <sup>2+</sup> | Al <sup>3+</sup> | Na <sup>+</sup> | eCEC   | Ca/Mg | K/Mg |
|------------------------------------|--------------------------|-------------|--------------------|-------|--------------------|---------------------|--------------------------|--------|----------------|------------------|------------------|------------------|-----------------|--------|-------|------|
|                                    |                          |             | g kg <sup>-1</sup> | %     | g kg <sup>-1</sup> | mg kg <sup>-1</sup> | cmol(+) kg <sup>-1</sup> |        |                |                  |                  |                  |                 |        |       |      |
| 4 <sup>th</sup> sampling – October |                          |             |                    |       |                    |                     |                          |        |                |                  |                  |                  |                 |        |       |      |
| A1                                 | 7.1a                     | 6.4a        | 33.0c              | 6.6c  | 1.8d               | 314d                | 69c                      | 18.9g  | 0.8c           | 20.6b            | 2.5f             | 0.1d             | 0.2c            | 24.1c  | 8.4e  | 0.3e |
| A2                                 | 6.8b                     | 6.2b        | 35.0c              | 7.0c  | 3.1c               | 612a                | 61c                      | 11.5h  | 1.5b           | 17.7c            | 3.0e             | 0.1d             | 0.2c            | 22.5c  | 6.0f  | 0.5d |
| A3                                 | 7.1a                     | 6.6a        | 26.5d              | 5.3d  | 1.9d               | 230d                | 53d                      | 14.1h  | 0.6c           | 19.7c            | 1.7f             | 0.1d             | 0.2c            | 22.2c  | 11.9c | 0.3e |
| A4                                 | 6.7b                     | 5.8b        | 31.5c              | 6.3c  | 2.8d               | 254d                | 60c                      | 11.4h  | 0.6c           | 14.6d            | 2.7e             | 0.1d             | 0.2c            | 18.2d  | 5.5f  | 0.2e |
| A5                                 | 7.1a                     | 6.5a        | 27.5c              | 5.5c  | 2.4d               | 350c                | 41d                      | 11.3h  | 0.9c           | 22.5b            | 1.9f             | 0.1d             | 0.2c            | 25.6c  | 11.8c | 0.5d |
| A6                                 | 7.2a                     | 6.5a        | 24.5d              | 4.9d  | 1.7d               | 188e                | 21e                      | 14.7h  | 0.5c           | 14.6d            | 1.1g             | 0.1d             | 0.1c            | 16.4d  | 13.4c | 0.4e |
| B1                                 | 7.3a                     | 6.7a        | 29.0c              | 5.8c  | 2.6d               | 396c                | 68c                      | 11.1h  | 1.0b           | 19.9c            | 3.7e             | 0.1d             | 0.1c            | 24.9c  | 5.4f  | 0.3e |
| B2                                 | 7.6a                     | 7.0a        | 18.0e              | 3.6e  | 1.5d               | 262d                | 82b                      | 12.4h  | 0.7c           | 15.4d            | 3.6e             | 0.1d             | 0.1c            | 19.9d  | 4.3f  | 0.2e |
| B3                                 | 6.2c                     | 5.7b        | 24.0d              | 4.8d  | 2.0d               | 364c                | 127a                     | 11.8h  | 0.9c           | 12.6d            | 3.2e             | 0.1d             | 0.2c            | 17.0d  | 3.9f  | 0.3e |
| B4                                 | 7.5a                     | 6.9a        | 30.5c              | 6.1c  | 2.1d               | 288d                | 85b                      | 14.5h  | 0.7c           | 25.7b            | 3.2e             | 0.1d             | 0.2c            | 29.9b  | 8.1e  | 0.2e |
| B4                                 | 7.3a                     | 6.6a        | 28.0c              | 5.6c  | 2.1d               | 302d                | 69c                      | 13.7h  | 0.8c           | 15.0d            | 5.6c             | 0.1d             | 0.2c            | 21.6c  | 2.7g  | 0.1e |
| B6                                 | 7.3a                     | 6.5a        | 37.5c              | 7.5c  | 2.4d               | 378c                | 34d                      | 15.6h  | 0.9c           | 13.9d            | 6.1c             | 0.1d             | 0.2c            | 21.2c  | 2.3g  | 0.2e |
| B7                                 | 6.9b                     | 6.2b        | 45.5b              | 9.1b  | 2.5d               | 390c                | 49d                      | 18.5g  | 1.0b           | 18.0c            | 4.8d             | 0.1d             | 0.2c            | 24.1c  | 3.8f  | 0.2e |
| B8                                 | 6.6b                     | 5.9b        | 49.0b              | 9.8b  | 3.2c               | 424c                | 39d                      | 15.6h  | 1.1b           | 13.6d            | 6.4c             | 0.1d             | 0.2c            | 21.4c  | 2.1g  | 0.2e |
| CA                                 | 4.8d                     | 4.2d        | 56.1a              | 11.2a | 11.5a              | 110e                | 2e                       | 4.9i   | 0.4d           | 0.2g             | 0.3h             | 1.6b             | 0.2c            | 2.7h   | 0.7h  | 1.3b |
| CB                                 | 4.8d                     | 4.0d        | 43.1b              | 8.6b  | 4.0c               | 135e                | 9e                       | 10.8h  | 0.3d           | 1.9f             | 0.7h             | 2.7a             | 0.2c            | 5.8g   | 2.7g  | 0.4e |
| 5 <sup>th</sup> sampling – March   |                          |             |                    |       |                    |                     |                          |        |                |                  |                  |                  |                 |        |       |      |
| A1                                 | 7.0b                     | 6.1b        | 34.0c              | 6.8c  | 3.3c               | 332d                | 72c                      | 10.2   | 0.8c           | 18.3c            | 3.2e             | 0.1d             | 0.1c            | 22.6c  | 5.8f  | 0.3e |
| A2                                 | 7.0b                     | 6.2b        | 33.0c              | 6.6c  | 4.0c               | 570a                | 46d                      | 8.2i   | 1.4b           | 13.8d            | 2.3f             | 0.1d             | 0.2c            | 17.8d  | 6.0f  | 0.6d |
| A3                                 | 7.4a                     | 6.8a        | 30.5c              | 6.1c  | 3.0c               | 330d                | 56c                      | 10.3h  | 0.8c           | 17.5c            | 1.2g             | 0.1d             | 0.2c            | 19.8d  | 14.3c | 0.7d |
| A4                                 | 6.8b                     | 6.4a        | 27.5c              | 5.5c  | 2.8d               | 366c                | 65c                      | 9.8i   | 0.9c           | 13.8d            | 2.4f             | 0.1d             | 0.1c            | 17.4d  | 5.7f  | 0.4e |
| A5                                 | 7.4a                     | 6.8a        | 29.5c              | 5.9c  | 1.9d               | 306d                | 76c                      | 15.3h  | 0.8c           | 21.4b            | 1.3g             | 0.1d             | 0.1c            | 23.7c  | 16.7b | 0.6d |
| A6                                 | 7.2a                     | 6.6a        | 31.0c              | 6.2c  | 3.7c               | 234d                | 83b                      | 8.4i   | 0.6c           | 18.6c            | 1.5f             | 0.1d             | 0.2c            | 20.9c  | 12.7c | 0.4e |
| B1                                 | 7.5a                     | 6.7a        | 31.0c              | 6.2c  | 1.9d               | 444c                | 70c                      | 16.1h  | 1.1b           | 16.1c            | 4.0d             | 0.1d             | 0.1c            | 21.4c  | 4.1f  | 0.3e |
| B2                                 | 7.5a                     | 7.0a        | 19.0e              | 3.8e  | 1.2d               | 254d                | 95b                      | 15.5h  | 0.6c           | 17.0c            | 2.7e             | 0.1d             | 0.2c            | 20.6c  | 6.3e  | 0.2e |
| B3                                 | 7.8a                     | 7.1a        | 26.0d              | 5.2d  | 2.2d               | 320d                | 119a                     | 11.6h  | 0.8c           | 21.2b            | 4.9d             | 0.1d             | 0.2c            | 27.1b  | 4.4f  | 0.2e |
| B4                                 | 7.5a                     | 6.7a        | 32.5c              | 6.5c  | 1.8d               | 340c                | 78c                      | 17.9g  | 0.9c           | 16.7c            | 3.4e             | 0.1d             | 0.2c            | 41.2a  | 4.9f  | 0.3e |
| B4                                 | 7.6a                     | 6.9a        | 26.5d              | 5.3d  | 1.6d               | 314d                | 68c                      | 16.8h  | 0.8c           | 12.8d            | 4.7d             | 0.1d             | 0.1c            | 18.5d  | 2.7g  | 0.2e |
| B6                                 | 7.0b                     | 6.2b        | 41.5b              | 8.3b  | 3.5c               | 366c                | 43d                      | 11.9h  | 0.9c           | 14.3d            | 4.0e             | 0.1d             | 0.3b            | 19.6d  | 3.6f  | 0.2e |
| B7                                 | 7.2a                     | 6.5a        | 49.5b              | 9.9b  | 3.2c               | 366c                | 45d                      | 15.7h  | 0.9c           | 17.8c            | 8.5b             | 0.1d             | 0.2c            | 27.5b  | 2.1g  | 0.1e |
| B8                                 | 7.1a                     | 6.3a        | 40.0b              | 8.0b  | 2.3d               | 328d                | 37d                      | 17.6h  | 0.8c           | 13.5d            | 5.9              | 0.1d             | 0.2c            | 20.5c  | 2.3g  | 0.1e |
| CA                                 | 5.0d                     | 4.4d        | 63.5a              | 12.7a | 11.4a              | 115a                | 2e                       | 5.6i   | 0.3d           | 0.3g             | 0.3h             | 1.7b             | 0.2c            | 2.8h   | 1.0hg | 1.0c |
| CB                                 | 5.1d                     | 4.0d        | 47.5b              | 9.5b  | 3.9c               | 128a                | 8e                       | 12.2h  | 0.3d           | 1.7f             | 0.8h             | 2.7a             | 0.2c            | 5.7g   | 2.1gg | 0.4e |
| 6 <sup>th</sup> sampling – July    |                          |             |                    |       |                    |                     |                          |        |                |                  |                  |                  |                 |        |       |      |
| A1                                 | 6.5b                     | 5.7b        | 30.0c              | 6.0c  | 2.3d               | 296d                | 50d                      | 13.2h  | 0.7c           | 9.2e             | 2.6f             | 0.1d             | 0.2c            | 12.9e  | 3.6f  | 0.3e |
| A2                                 | 7.7a                     | 6.9a        | 29.0c              | 5.8c  | 2.5d               | 324d                | 110a                     | 11.8h  | 0.8c           | 16.0c            | 1.8f             | 0.1d             | 0.2c            | 18.8d  | 9.1d  | 0.5d |
| A3                                 | 6.5b                     | 5.8b        | 26.5d              | 5.3d  | 2.6d               | 442c                | 55c                      | 10.1hi | 1.1b           | 7.7e             | 2.1f             | 0.1d             | 0.1c            | 11.1e  | 3.7f  | 0.5d |
| A4                                 | 7.5a                     | 6.9a        | 25.5d              | 5.1d  | 2.6d               | 244d                | 51d                      | 9.7i   | 0.6c           | 10.7d            | 1.2g             | 0.1d             | 0.1c            | 12.7e  | 8.9d  | 0.5d |
| A5                                 | 7.0b                     | 6.3a        | 26.0d              | 5.2d  | 3.0c               | 316d                | 70c                      | 8.7i   | 0.8c           | 8.9e             | 2.4f             | 0.1d             | 0.1c            | 12.3e  | 3.8f  | 0.3e |
| A6                                 | 7.3a                     | 6.6a        | 27.0d              | 5.4d  | 1.9d               | 246d                | 81b                      | 14.0h  | 0.6c           | 9.0e             | 3.9e             | 0.1d             | 0.1c            | 13.8e  | 2.3g  | 0.2e |
| B1                                 | 7.1a                     | 6.5a        | 28.5c              | 5.7c  | 3.3c               | 294d                | 60c                      | 8.6i   | 0.7c           | 13.0d            | 1.4g             | 0.1d             | 0.2c            | 15.4d  | 9.4d  | 0.5d |
| B2                                 | 7.6a                     | 6.9a        | 16.5e              | 3.3e  | 0.9e               | 284d                | 100b                     | 18.9g  | 0.7c           | 8.4e             | 3.4e             | 0.1d             | 0.1c            | 12.7e  | 2.5g  | 0.2e |
| B3                                 | 7.0b                     | 6.4a        | 18.0e              | 3.6e  | 1.2d               | 278d                | 60c                      | 14.7h  | 0.7c           | 6.6e             | 1.6f             | 0.1d             | 0.1c            | 9.1f   | 4.1f  | 0.4e |
| B4                                 | 7.3a                     | 6.5a        | 28.5c              | 5.7c  | 2.3d               | 314d                | 94b                      | 12.5h  | 0.8c           | 8.9e             | 3.3e             | 0.1d             | 0.1c            | 13.2e  | 2.7g  | 0.2e |
| B4                                 | 7.3a                     | 6.5a        | 25.0d              | 5.0c  | 2.6d               | 280d                | 120a                     | 9.5i   | 0.7c           | 10.4d            | 3.3e             | 0.1d             | 0.1c            | 14.7de | 3.1g  | 0.2e |
| B6                                 | 6.9b                     | 6.3a        | 39.5c              | 7.9b  | 2.6d               | 440c                | 60c                      | 15.1h  | 1.1b           | 9.7e             | 6.1c             | 0.1d             | 0.2c            | 17.2d  | 1.6g  | 0.2e |
| B7                                 | 6.8b                     | 6.2a        | 50.5b              | 10.1b | 5.8b               | 272d                | 131a                     | 8.7i   | 5.2a           | 15.2d            | 3.9e             | 0.1d             | 0.6a            | 25.0c  | 3.9f  | 1.3b |
| B8                                 | 7.1a                     | 6.3a        | 40.0b              | 8.0b  | 2.3d               | 328d                | 37d                      | 17.6h  | 0.8c           | 13.5d            | 5.9c             | 0.1d             | 0.2c            | 20.5c  | 2.3g  | 0.1e |
| CA                                 | 4.9d                     | 4.2d        | 63.2a              | 12.6a | 11.0a              | 112e                | 2e                       | 5.7i   | 0.4d           | 0.3g             | 0.2h             | 1.7b             | 0.3b            | 2.9h   | 1.5gh | 2.0a |
| CB                                 | 4.8d                     | 3.8d        | 48.5b              | 9.7b  | 3.8c               | 137e                | 9e                       | 12.8h  | 0.3d           | 1.8f             | 0.8h             | 2.9a             | 0.2c            | 6.0g   | 2.3g  | 0.4e |

Org C: Organic carbon content; OM: Organic matter; eCEC: effective cation exchange capacity. In each column, values with different letters differ significantly ( $p < 0.05$ ).

**Table S6.** Chemical soil characteristics (Third year of sampling).

| Soil                               | pH<br>(H <sub>2</sub> O) | pH<br>(KCl) | Org C              | OM    | N                  | K                   | P                        | C/N    | K <sup>+</sup> | Ca <sup>2+</sup> | Mg <sup>2+</sup> | Al <sup>3+</sup> | Na <sup>+</sup> | eCEC   | Ca/Mg | K/Mg  |
|------------------------------------|--------------------------|-------------|--------------------|-------|--------------------|---------------------|--------------------------|--------|----------------|------------------|------------------|------------------|-----------------|--------|-------|-------|
|                                    |                          |             | g kg <sup>-1</sup> | %     | g kg <sup>-1</sup> | mg kg <sup>-1</sup> | cmol(+) kg <sup>-1</sup> |        |                |                  |                  |                  |                 |        |       |       |
| 7 <sup>th</sup> sampling – October |                          |             |                    |       |                    |                     |                          |        |                |                  |                  |                  |                 |        |       |       |
| A1                                 | 6.7b                     | 5.9b        | 23.0d              | 4.6d  | 3.5c               | 230d                | 44d                      | 6.6i   | 0.6c           | 8.3e             | 2.4f             | 0.1d             | 0.1c            | 11.5e  | 3.4g  | 0.2e  |
| A2                                 | 7.1a                     | 6.5a        | 28.5c              | 5.7c  | 3.2c               | 294d                | 60c                      | 9.1i   | 0.7c           | 13.0d            | 1.4g             | 0.1d             | 0.2c            | 15.4d  | 9.4d  | 0.5d  |
| A3                                 | 7.4a                     | 6.5a        | 31.5c              | 6.3c  | 3.9c               | 554b                | 65c                      | 8.2i   | 1.4b           | 12.9d            | 1.8f             | 0.1d             | 0.2c            | 16.3d  | 7.2e  | 0.8d  |
| A4                                 | 7.0b                     | 6.2a        | 23.0d              | 4.6d  | 1.8d               | 260d                | 35d                      | 13.1h  | 0.7c           | 8.1e             | 2.0f             | 0.1d             | 0.1c            | 11.0e  | 4.1f  | 0.3e  |
| A5                                 | 7.6a                     | 6.8a        | 28.5c              | 5.7c  | 1.8d               | 192e                | 63c                      | 16.3h  | 0.5c           | 15.7c            | 1.1g             | 0.1d             | 0.1c            | 17.5d  | 14.0c | 0.4e  |
| A6                                 | 7.4a                     | 6.6a        | 22.0d              | 4.4d  | 1.8d               | 210e                | 51d                      | 12.6h  | 0.5c           | 10.5d            | 1.2g             | 0.1d             | 0.2c            | 12.5e  | 8.9d  | 0.4e  |
| B1                                 | 7.0b                     | 6.2a        | 30.0c              | 6.0c  | 2.1d               | 318d                | 61c                      | 14.3h  | 0.8c           | 8.9e             | 3.4e             | 0.1d             | 0.1c            | 13.3e  | 2.6g  | 0.2e  |
| B2                                 | 7.8a                     | 6.8a        | 16.5e              | 3.3e  | 1.8d               | 308d                | 79c                      | 9.4i   | 0.8c           | 8.3e             | 2.7e             | 0.1d             | 0.1c            | 11.9e  | 3.1g  | 0.3e  |
| B3                                 | 7.4a                     | 6.5a        | 31.0c              | 6.2c  | 3.2c               | 256d                | 109a                     | 9.8i   | 0.6c           | 10.5d            | 3.6e             | 0.1d             | 0.2c            | 14.9d  | 3.0g  | 0.2e  |
| B4                                 | 7.3a                     | 6.3a        | 27.0d              | 5.4d  | 2.1d               | 270d                | 55c                      | 12.9h  | 0.7c           | 7.8e             | 2.4f             | 0.1d             | 0.1c            | 11.1e  | 3.2g  | 0.3e  |
| B4                                 | 7.7a                     | 6.8a        | 37.0c              | 7.4c  | 3.9c               | 294d                | 72c                      | 9.6i   | 0.7c           | 11.7d            | 4.9d             | 0.1d             | 0.1c            | 17.5d  | 2.4g  | 0.2e  |
| B6                                 | 7.2a                     | 6.2a        | 43.5b              | 8.7b  | 3.9c               | 394c                | 54c                      | 11.3h  | 1.0bc          | 9.2e             | 5.4c             | 0.1d             | 0.2c            | 15.8d  | 1.7g  | 0.2e  |
| B7                                 | 7.2a                     | 6.3a        | 47.0b              | 9.4b  | 3.2c               | 358c                | 55c                      | 14.9h  | 0.9c           | 11.7d            | 6.4c             | 0.1d             | 0.1c            | 19.2d  | 1.8g  | 0.1e  |
| B8                                 | 7.3a                     | 6.4a        | 44.0b              | 8.8b  | 3.2c               | 338c                | 50d                      | 14.0h  | 0.9c           | 10.9d            | 6.0c             | 0.1d             | 0.1c            | 18.0d  | 1.8g  | 0.1e  |
| CA                                 | 4.8d                     | 4.3d        | 58.2a              | 11.6a | 11.5a              | 112e                | 2e                       | 5.1i   | 0.4d           | 0.2g             | 0.3h             | 1.6b             | 0.2c            | 2.7h   | 0.7h  | 1.3b  |
| CB                                 | 4.7d                     | 3.8d        | 46.4b              | 9.3b  | 3.7c               | 130e                | 8e                       | 12.5h  | 0.2d           | 1.8f             | 0.7h             | 2.6a             | 0.2c            | 5.5g   | 2.6g  | 0.3e  |
| 8 <sup>th</sup> sampling – March   |                          |             |                    |       |                    |                     |                          |        |                |                  |                  |                  |                 |        |       |       |
| A1                                 | 6.5b                     | 5.8b        | 27.0d              | 5.4d  | 2.8d               | 264d                | 52d                      | 9.6i   | 0.7c           | 8.4e             | 2.3f             | 0.1d             | 0.2c            | 11.7e  | 3.6f  | 0.3e  |
| A2                                 | 6.4b                     | 5.8b        | 31.5c              | 6.3c  | 2.8d               | 314d                | 50d                      | 11.3h  | 0.8c           | 10.0e            | 2.6f             | 0.1d             | 0.2c            | 13.7e  | 3.8f  | 0.3e  |
| A3                                 | 6.8a                     | 6.2a        | 34.0c              | 6.8c  | 2.5d               | 192e                | 52d                      | 13.9h  | 0.5c           | 12.2d            | 1.4g             | 0.1d             | 0.2c            | 14.4de | 8.7r  | 0.3e  |
| A4                                 | 6.5b                     | 5.7b        | 22.0d              | 4.4d  | 2.5d               | 258d                | 37d                      | 9.0i   | 0.6c           | 6.8e             | 1.8f             | 0.1d             | 0.2c            | 9.5f   | 3.7f  | 0.4e  |
| A5                                 | 7.2a                     | 6.5a        | 27.0c              | 5.4c  | 2.1d               | 212e                | 50d                      | 12.9h  | 0.5c           | 13.7d            | 1.1g             | 0.1d             | 0.2c            | 15.6d  | 12.5c | 0.5d  |
| A6                                 | 7.3a                     | 6.7a        | 20.5d              | 4.1d  | 1.4e               | 160e                | 46d                      | 14.6h  | 0.4c           | 10.5d            | 1.4g             | 0.1d             | 0.1c            | 12.6e  | 7.4e  | 0.3e  |
| B1                                 | 6.7a                     | 6.0a        | 28.0d              | 5.6d  | 2.1d               | 254d                | 48d                      | 13.3h  | 0.6c           | 9.6e             | 3.1e             | 0.1d             | 0.2c            | 13.7e  | 3.1g  | 0.2e  |
| B2                                 | 7.3a                     | 6.6a        | 17.0e              | 3.4e  | 1.4e               | 174e                | 65c                      | 12.1h  | 0.4c           | 7.9e             | 2.3f             | 0.1d             | 0.1c            | 10.8ef | 3.4g  | 0.2e  |
| B3                                 | 7.2a                     | 6.4a        | 27.5c              | 5.5c  | 1.8d               | 234d                | 97b                      | 15.7h  | 0.6c           | 10.7d            | 3.9e             | 0.1d             | 0.2c            | 15.5d  | 2.7g  | 0.2e  |
| B4                                 | 6.8a                     | 6.1a        | 36.0c              | 7.2c  | 2.1d               | 160e                | 64c                      | 17.1gh | 0.4c           | 10.1e            | 2.4f             | 0.1d             | 0.2c            | 13.1e  | 4.3f  | 0.2e  |
| B4                                 | 6.4b                     | 5.7b        | 39.0c              | 7.8c  | 2.5d               | 234d                | 68c                      | 15.9h  | 0.6c           | 10.2e            | 3.4e             | 0.1d             | 0.2c            | 14.5de | 3.0g  | 0.2e  |
| B6                                 | 6.7a                     | 6.2a        | 27.0d              | 5.4d  | 1.6d               | 222e                | 60c                      | 17.1gh | 0.6c           | 9.6e             | 3.0e             | 0.1d             | 0.1c            | 13.4e  | 3.2g  | 0.2e  |
| B7                                 | 6.9a                     | 6.1a        | 30.0d              | 6.0d  | 2.8d               | 186e                | 58c                      | 10.7h  | 0.5c           | 8.3e             | 3.9e             | 0.1d             | 0.2c            | 13.0e  | 2.1g  | 0.1e  |
| B8                                 | 6.7a                     | 5.9b        | 51.5b              | 10.3b | 2.5d               | 276d                | 28d                      | 21.0g  | 0.7c           | 8.4e             | 5.3c             | 0.1d             | 0.2c            | 14.6e  | 1.6g  | 0.1e  |
| CA                                 | 4.9d                     | 4.4d        | 61.8a              | 12.4a | 11.4a              | 111e                | 3e                       | 5.4i   | 0.3d           | 0.3g             | 0.3h             | 1.7b             | 0.2c            | 2.8h   | 1.0h  | 1.0c  |
| CB                                 | 4.9d                     | 4.0d        | 50.2b              | 10.0b | 3.8c               | 133e                | 9e                       | 13.2h  | 0.3d           | 1.9f             | 0.8h             | 2.9a             | 0.3b            | 6.2g   | 2.4g  | 0.4e  |
| 9 <sup>th</sup> sampling – October |                          |             |                    |       |                    |                     |                          |        |                |                  |                  |                  |                 |        |       |       |
| A1                                 | 6.8a                     | 5.9a        | 24.0d              | 4.8d  | 2.3d               | 412c                | 48d                      | 10.5hi | 1.0b           | 8.3e             | 2.1f             | 0.1d             | 0.2c            | 11.7e  | 3.9f  | 0.5d  |
| A2                                 | 6.3b                     | 5.4b        | 31.0c              | 6.2c  | 2.5d               | 536b                | 113a                     | 12.7h  | 1.3b           | 7.6e             | 1.9f             | 0.3c             | 0.2c            | 11.3e  | 4.1f  | 0.7d  |
| A3                                 | 7.1a                     | 6.3a        | 32.5c              | 6.5c  | 3.2c               | 388c                | 53d                      | 10.3hi | 1.0b           | 13.1d            | 1.5f             | 0.1d             | 0.3b            | 15.9d  | 8.8e  | 0.7de |
| A4                                 | 6.6b                     | 5.8b        | 22.5d              | 4.5d  | 2.3d               | 236d                | 52d                      | 9.9i   | 0.6c           | 7.4e             | 2.0f             | 0.1d             | 0.2c            | 10.2e  | 3.8f  | 0.3d  |
| A5                                 | 7.0a                     | 6.6a        | 33.0c              | 6.6c  | 2.3d               | 398c                | 74c                      | 14.5h  | 1.0bc          | 15.1d            | 1.6f             | 0.1d             | 0.2c            | 18.0d  | 9.7d  | 0.7d  |
| A6                                 | 7.0a                     | 6.3a        | 25.5d              | 5.1d  | 2.3d               | 346c                | 80b                      | 11.2h  | 0.9c           | 10.1e            | 1.2g             | 0.1d             | 0.2c            | 12.4e  | 8.8e  | 0.8d  |
| B1                                 | 6.5b                     | 5.8b        | 25.5d              | 5.1d  | 1.8d               | 532b                | 62c                      | 14.6h  | 1.3b           | 7.0e             | 2.5f             | 0.1d             | 0.2c            | 11.1e  | 2.9g  | 0.5d  |
| B2                                 | 6.9a                     | 6.2a        | 15.5e              | 3.1e  | 1.4e               | 282d                | 105b                     | 11.1h  | 0.7c           | 6.9e             | 2.2f             | 0.1d             | 0.2c            | 10.1ef | 3.2g  | 0.3e  |
| B3                                 | 6.4b                     | 5.5b        | 18.0e              | 3.6e  | 1.8d               | 166e                | 63c                      | 10.1hi | 0.4c           | 5.2e             | 2.1f             | 0.1d             | 0.2c            | 8.0fg  | 2.4g  | 0.2e  |
| B4                                 | 7.0a                     | 6.2a        | 24.0d              | 4.8d  | 2.3d               | 268d                | 91b                      | 10.5hi | 0.7c           | 8.4e             | 3.4e             | 0.1d             | 0.2c            | 12.8e  | 2.5g  | 0.2e  |
| B4                                 | 7.3a                     | 6.6a        | 35.0c              | 7.0c  | 2.3d               | 250d                | 125a                     | 15.4h  | 0.6c           | 10.7d            | 4.0d             | 0.1d             | 0.2c            | 15.7d  | 2.7g  | 0.2e  |
| B6                                 | 6.7a                     | 5.8b        | 32.5c              | 6.5c  | 3.2c               | 348c                | 64c                      | 10.3hi | 0.9c           | 7.9e             | 3.2e             | 0.1d             | 0.3b            | 12.4e  | 2.5g  | 0.3e  |
| B7                                 | 6.6b                     | 5.8b        | 33.5c              | 6.7c  | 4.0c               | 434c                | 127a                     | 8.3i   | 1.1b           | 7.4e             | 3.7e             | 0.1d             | 0.2c            | 12.5e  | 2.0g  | 0.3e  |
| B8                                 | 7.0a                     | 6.2a        | 40.0b              | 8.0b  | 4.0c               | 324d                | 39d                      | 9.9i   | 0.8c           | 12.4d            | 6.3c             | 0.1d             | 0.3b            | 19.9c  | 2.0g  | 0.1e  |
| CA                                 | 5.0d                     | 4.3d        | 61.4a              | 12.3a | 11.3a              | 110e                | 3e                       | 5.4i   | 0.4d           | 0.2g             | 0.2h             | 1.6b             | 0.2c            | 2.6h   | 1.0h  | 2.0a  |
| CB                                 | 4.9d                     | 3.8d        | 49.5b              | 9.9b  | 3.9c               | 132e                | 9e                       | 12.7h  | 0.3d           | 2.0f             | 0.8h             | 2.8a             | 0.2c            | 6.1g   | 2.5g  | 0.4e  |

Org C: Organic carbon content; OM: Organic matter; eCEC: effective cation exchange capacity. In each column, values with different letters differ significantly ( $p < 0.05$ ).

**Table S7.** Total and available contents of copper and zinc in vineyard soils and controls.

| Soil | 1st sampling (year 1) |                 |                |                | 2nd sampling (year 2) |                 |                 |                | 3rd sampling (year 3) |                  |                 |                 |
|------|-----------------------|-----------------|----------------|----------------|-----------------------|-----------------|-----------------|----------------|-----------------------|------------------|-----------------|-----------------|
|      | CuT                   | CuA             | ZnT            | ZnA            | CuT                   | CuA             | ZnT             | ZnA            | CuT                   | CuA              | ZnT             | ZnA             |
|      | mg kg <sup>-1</sup>   |                 |                |                |                       |                 |                 |                |                       |                  |                 |                 |
| A1   | 206b, <i>b</i>        | 16.6d, <i>b</i> | 103a, <i>c</i> | 2.8a, <i>c</i> | 189c, <i>b</i>        | 17.2d, <i>b</i> | 115b, <i>b</i>  | 6.7a, <i>b</i> | 241b, <i>a</i>        | 28.7e, <i>a</i>  | 140c, <i>a</i>  | 17.5b, <i>a</i> |
| A2   | 208b, <i>b</i>        | 17.0d, <i>b</i> | 108a, <i>c</i> | 2.6a, <i>c</i> | 195c, <i>b</i>        | 17.5d, <i>b</i> | 124b, <i>b</i>  | 6.5a, <i>b</i> | 247b, <i>a</i>        | 28.8e, <i>a</i>  | 153b, <i>a</i>  | 17.3b, <i>a</i> |
| A3   | 210b, <i>b</i>        | 18.2d, <i>b</i> | 111a, <i>c</i> | 2.9a, <i>c</i> | 219b, <i>b</i>        | 20.1d, <i>b</i> | 132a, <i>b</i>  | 6.8a, <i>b</i> | 271b, <i>a</i>        | 31.6e, <i>a</i>  | 165a, <i>a</i>  | 16.7b, <i>a</i> |
| A4   | 206b, <i>b</i>        | 14.9d, <i>b</i> | 103a, <i>c</i> | 2.8a, <i>c</i> | 208b, <i>b</i>        | 15.4d, <i>b</i> | 121b, <i>b</i>  | 6.7a, <i>b</i> | 260b, <i>a</i>        | 26.9e, <i>a</i>  | 145c, <i>a</i>  | 18.1b, <i>a</i> |
| A5   | 208b, <i>b</i>        | 14.6d, <i>b</i> | 108a, <i>c</i> | 2.6a, <i>c</i> | 213b, <i>b</i>        | 15.8d, <i>b</i> | 142a, <i>b</i>  | 6.5a, <i>b</i> | 265b, <i>a</i>        | 27.3e, <i>a</i>  | 171a, <i>a</i>  | 18.5b, <i>a</i> |
| A6   | 210b, <i>b</i>        | 15.2d, <i>b</i> | 111a, <i>c</i> | 2.9a, <i>c</i> | 215b, <i>b</i>        | 16.7d, <i>b</i> | 130a, <i>b</i>  | 6.8a, <i>b</i> | 267b, <i>a</i>        | 28.2e, <i>a</i>  | 158b, <i>a</i>  | 17.2b, <i>a</i> |
| B1   | 117c, <i>c</i>        | 17.6d, <i>b</i> | 70c, <i>c</i>  | 2.0b, <i>c</i> | 132d, <i>b</i>        | 18.2d, <i>b</i> | 93.6d, <i>b</i> | 5.9b, <i>b</i> | 184d, <i>a</i>        | 83.7a, <i>a</i>  | 132d, <i>a</i>  | 22.3a, <i>a</i> |
| B2   | 114c, <i>c</i>        | 18.2d, <i>b</i> | 72c, <i>c</i>  | 1.8b, <i>c</i> | 126d, <i>b</i>        | 23.9d, <i>b</i> | 89.5d, <i>b</i> | 5.7b, <i>b</i> | 178d, <i>a</i>        | 92.4a, <i>a</i>  | 131d, <i>a</i>  | 21.3a, <i>a</i> |
| B3   | 301a, <i>c</i>        | 27.4c, <i>b</i> | 68c, <i>c</i>  | 1.4c, <i>c</i> | 318a, <i>b</i>        | 32.4c, <i>b</i> | 84.4d, <i>b</i> | 5.3b, <i>b</i> | 370a, <i>a</i>        | 89.9a, <i>a</i>  | 130d, <i>a</i>  | 23.1a, <i>a</i> |
| B4   | 309a, <i>c</i>        | 35.4b, <i>b</i> | 90b, <i>c</i>  | 1.9b, <i>c</i> | 324a, <i>b</i>        | 42.5b, <i>b</i> | 112b, <i>b</i>  | 5.8b, <i>b</i> | 376a, <i>a</i>        | 62.0c, <i>a</i>  | 145c, <i>a</i>  | 18.6b, <i>a</i> |
| B4   | 131bc, <i>b</i>       | 26.2c, <i>c</i> | 88b, <i>c</i>  | 1.7b, <i>c</i> | 123d, <i>b</i>        | 39.2b, <i>b</i> | 118b, <i>b</i>  | 5.6b, <i>b</i> | 175d, <i>a</i>        | 55.7d, <i>a</i>  | 158b, <i>a</i>  | 17.9b, <i>a</i> |
| B6   | 306a, <i>c</i>        | 56.9a, <i>b</i> | 88b, <i>c</i>  | 1.5c, <i>c</i> | 319a, <i>b</i>        | 63.7a, <i>b</i> | 109c, <i>b</i>  | 5.4b, <i>b</i> | 371a, <i>a</i>        | 79.2ab, <i>a</i> | 135d, <i>a</i>  | 17.9b, <i>a</i> |
| B7   | 149b, <i>c</i>        | 51.2a, <i>b</i> | 110a, <i>c</i> | 1.8b, <i>c</i> | 160c, <i>b</i>        | 57.8a, <i>b</i> | 123b, <i>b</i>  | 5.7b, <i>b</i> | 212c, <i>a</i>        | 77.3b, <i>a</i>  | 146c, <i>a</i>  | 18.6b, <i>a</i> |
| B8   | 140b, <i>c</i>        | 49.4a, <i>b</i> | 109a, <i>c</i> | 1.9b, <i>c</i> | 152c, <i>b</i>        | 52.4a, <i>b</i> | 125b, <i>b</i>  | 5.8b, <i>b</i> | 204c, <i>a</i>        | 70.9b, <i>a</i>  | 144c, <i>a</i>  | 18.8b, <i>a</i> |
| CA   | 39d, <i>a</i>         | 1.2e, <i>b</i>  | 63d, <i>b</i>  | 0.8d, <i>c</i> | 41e, <i>b</i>         | 1.2e, <i>a</i>  | 67.3e, <i>b</i> | 1.5c, <i>b</i> | 44e, <i>a</i>         | 7.1f, <i>a</i>   | 78.3e, <i>a</i> | 2.8c, <i>a</i>  |
| CB   | 28d, <i>b</i>         | 1.1e, <i>b</i>  | 61d, <i>c</i>  | 0.9d, <i>c</i> | 30e, <i>b</i>         | 1.1e, <i>b</i>  | 66.9e, <i>b</i> | 1.9c, <i>b</i> | 53e, <i>a</i>         | 9.7f, <i>a</i>   | 74.9e, <i>a</i> | 3.6c, <i>a</i>  |

CuT: Copper total content; CuA: Copper available content; ZnT: Zinc total content; ZnA: Zinc available content. In each column, values with different letters differ significantly ( $p < 0.05$ ). In each row for each sampling year, CuT, CuA, ZnT or ZnA values with different *italics letters* different letters differ significantly ( $p < 0.05$ )
